# Supplementary material for: Testing of microsatellite multiplexes for individual identification of Cape Parrots (Poicephalus robustus): paternity testing and monitoring trade
Source: PeerJ. 2017 Mar 21;5:e2900. doi: 10.7717/peerj.2900 (PMC5363265; doi:10.7717/peerj.2900)
Supplement: Supplemental Information 4 [file peerj-05-2900-s004.xlsx]

## Sheet: GeneClass_Results
Supplementary Table 4. The population of origin results for each of the eight microsatellite panels tested in the current study as estimated from GeneClass.
	16 loci	15 loci	14 loci	13 loci	12 loci	11 loci	10 loci	9 loci
% correct assignments:	83.33	83.33	83.33	83.33	83.33	83.33	75	66.67
Average assignment probability:	0.523 (0.085)	0.520 (0.089)	0.518 (0.088)	0.546 (0.074)	0.565 (0.087)	0.533 (0.090)	0.552 (0.086)	0.547 (0.092)
16 loci
Sample ID:	Assigned sample	Captive	Eastern Cape	KwaZulu-Natal	Limpopo
Cap02	Cap01	0.58722	0.2775	0.07852	0.00016
O3i	Cap02	0.37727	0.13968	0.14962	0.00015
O6i	Cap03	0.79265	0.27397	0.26071	0.00063
O8i	Cap04	0.87874	0.6089	0.11566	0.00184
O11ii	Cap05	0.66789	0.23052	0.39861	0.00212
Cap14	Cap06	0.05733	0.02067	0.02191	0
FH12	EC01	0.50686	0.43901	0.12741	0.0001
FH32	EC02	0.14809	0.39724	0.44648	0.00011
KWT08	EC03	0.05887	0.30603	0.03044	0.00014
KZN02	KZN01	0.539	0.44854	0.67412	0.0003
KZN08	KZN02	0.09764	0.20423	0.21333	0.01442
KZN13	KZN03	0.3278	0.08856	0.67691	0.00222
15 loci:
Sample ID:	Assigned sample	Captive	Eastern Cape	KwaZulu-Natal	Limpopo
Cap02	Cap01	0.55556	0.24857	0.0695	0.0002
O3i	Cap02	0.34896	0.11725	0.1341	0.0001
O6i	Cap03	0.84047	0.3471	0.33304	0.00122
O8i	Cap04	0.85521	0.57799	0.10283	0.00184
O11ii	Cap05	0.63592	0.20335	0.37782	0.00225
Cap14	Cap06	0.06297	0.01087	0.02909	2e-05
FH12	EC01	0.56252	0.54478	0.16569	0.00016
FH32	EC02	0.13852	0.36443	0.42614	0.0001
KWT08	EC03	0.05654	0.27575	0.02528	0.0001
KZN02	KZN01	0.50748	0.41643	0.65559	0.00028
KZN08	KZN02	0.09313	0.17789	0.19512	0.014
KZN13	KZN03	0.36786	0.09565	0.77568	0.00451
14 loci:
Sample ID:	Assigned sample	Captive	Eastern Cape	KwaZulu-Natal	Limpopo
Cap02	Cap01	0.52202	0.23069	0.06323	0.00018
O3i	Cap02	0.32509	0.10966	0.12332	0.0001
O6i	Cap03	0.89511	0.37049	0.33271	0.00097
O8i	Cap04	0.83299	0.54701	0.09365	0.00196
O11ii	Cap05	0.60147	0.18919	0.35467	0.00247
Cap14	Cap06	0.10143	0.04538	0.08515	5e-05
FH12	EC01	0.6333	0.57244	0.1671	8e-05
FH32	EC02	0.1641	0.38963	0.42672	6e-05
KWT08	EC03	0.05731	0.29609	0.02609	6e-05
KZN02	KZN01	0.47486	0.39017	0.63023	0.00036
KZN08	KZN02	0.1055	0.19253	0.1962	0.01179
KZN13	KZN03	0.42728	0.1046	0.77713	0.00366
13 loci:
Sample ID:	Assigned sample	Captive	Eastern Cape	KwaZulu-Natal	Limpopo
Cap02	Cap01	0.51881	0.27018	0.0697	5e-05
O3i	Cap02	0.27118	0.10244	0.11139	4e-05
O6i	Cap03	0.90369	0.42604	0.35799	0.00052
O8i	Cap04	0.78996	0.52057	0.08368	0.001
O11ii	Cap05	0.54134	0.17684	0.32925	0.00131
Cap14	Cap06	0.58253	0.36049	0.4479	2e-05
FH12	EC01	0.57329	0.54633	0.15296	4e-05
FH32	EC02	0.15171	0.38734	0.43839	2e-05
KWT08	EC03	0.05451	0.29408	0.02693	3e-05
KZN02	KZN01	0.41298	0.36688	0.60116	7e-05
KZN08	KZN02	0.09862	0.19128	0.20308	0.00831
KZN13	KZN03	0.36738	0.09762	0.75225	0.00211
12 loci:
Sample ID:	Assigned sample	Captive	Eastern Cape	KwaZulu-Natal	Limpopo
Cap02	Cap01	0.76078	0.34446	0.15009	0.00011
O3i	Cap02	0.2172	0.07203	0.0913	1e-05
O6i	Cap03	0.91678	0.40718	0.3478	0.00025
O8i	Cap04	0.80353	0.50517	0.08007	0.00053
O11ii	Cap05	0.46243	0.13726	0.28388	0.00064
Cap14	Cap06	0.78932	0.49346	0.58076	1e-05
FH12	EC01	0.49386	0.48031	0.12551	1e-05
FH32	EC02	0.11718	0.32434	0.38386	1e-05
KWT08	EC03	0.03415	0.24035	0.02109	1e-05
KZN02	KZN01	0.40673	0.34547	0.59057	6e-05
KZN08	KZN02	0.07045	0.15007	0.1696	0.00483
KZN13	KZN03	0.30066	0.0679	0.69955	0.00097
11 loci:
Sample ID:	Assigned sample	Captive	Eastern Cape	KwaZulu-Natal	Limpopo
Cap02	Cap01	0.70704	0.28642	0.11002	2e-05
O3i	Cap02	0.18071	0.05814	0.06254	0
O6i	Cap03	0.93847	0.4347	0.35905	0.00049
O8i	Cap04	0.75578	0.44072	0.0543	0.00022
O11ii	Cap05	0.40483	0.11159	0.22309	0.00037
Cap14	Cap06	0.81817	0.52963	0.60829	0
FH12	EC01	0.43553	0.41526	0.09037	0
FH32	EC02	0.11336	0.34166	0.39705	0
KWT08	EC03	0.02699	0.24928	0.01846	0
KZN02	KZN01	0.35128	0.28757	0.51976	0
KZN08	KZN02	0.05141	0.12168	0.12563	0.00367
KZN13	KZN03	0.25269	0.05468	0.63423	0.00058
10 Loci:
Sample ID:	Assigned sample	Captive	Eastern Cape	KwaZulu-Natal	Limpopo
Cap02	Cap01	0.65857	0.25022	0.09214	0
O3i	Cap02	0.15763	0.05135	0.05137	0
O6i	Cap03	0.92611	0.60769	0.50881	0.00124
O8i	Cap04	0.70891	0.39555	0.04444	0.00025
O11ii	Cap05	0.36482	0.09705	0.19721	0.00035
Cap14	Cap06	0.79445	0.71014	0.77865	0
FH12	EC01	0.39824	0.39672	0.07836	0
FH32	EC02	0.09556	0.3028	0.3651	0
KWT08	EC03	0.01905	0.23315	0.01471	0
KZN02	KZN01	0.32115	0.27009	0.50275	0
KZN08	KZN02	0.04053	0.1132	0.11118	0.00309
KZN13	KZN03	0.22942	0.0523	0.61808	0.00047
9 loci:
Sample ID:	Assigned sample	Captive	Eastern Cape	KwaZulu-Natal	Limpopo
Cap02	Cap01	0.67744	0.65961	0.25365	4e-05
O3i	Cap02	0.11469	0.04888	0.03767	0
O6i	Cap03	0.90246	0.60917	0.46181	0.00051
O8i	Cap04	0.73603	0.35936	0.04605	7e-05
O11ii	Cap05	0.67447	0.1201	0.41107	0.0001
Cap14	Cap06	0.79396	0.64404	0.80497	9e-05
FH12	EC01	0.38141	0.33328	0.0734	0
FH32	EC02	0.07148	0.25126	0.37147	0
KWT08	EC03	0.2107	0.26301	0.14564	0
KZN02	KZN01	0.23806	0.20835	0.43007	0
KZN08	KZN02	0.02237	0.10986	0.08756	0.00143
KZN13	KZN03	0.17952	0.04982	0.57636	0.0001
Correct assignment:
Incorrect assignment:
